# Supplementary material
Source: publisher site journal article supplement (https://static.cambridge.org/content/id/urn:cambridge.org:id:article:S0899823X20003566/resource/name/S0899823X20003566supp001.docx)
Supplement: Supplementary file 1 [file S0899823X20003566supp001.docx]

**Table 1. Study characteristics of included articles**

| **Author, year, country** | **Study period** | **Study design** | **No. hospitals included** | **Setting** | **Study groups**  **(intervention vs control)** | **Catheter type** | **Antimicrobial-impregnated catheter** | **Skin antiseptic used** | **Maximal sterile barrier precautions during catheter insertion** | **Frequency of dressing change** |
| --- | --- | --- | --- | --- | --- | --- | --- | --- | --- | --- |
| Arpa, 2013, Turkey1 | April to December 2011 | Possible RCT | 1 | Post-operative cardiac surgery ICU  (pediatrics) | CHG 2% impregnated transparent dressing  vs  standard transparent dressing | Short-term CVC  (jugular, subclavian) | No | Povidone-iodine | Yes | Every 7 days or as needed |
| Arvaniti, 2012, Greece2 | June 2006- May 2008 | RCT | 5 hospitals | ICU (adults) | CHG sponge disc dressing (Biopatch®)  vs  polyurethane occlusive dressing | Short-term CVC  (jugular, subclavian, femoral) | Yes  (there is a group with silver-impregnated catheters, which has not been included in the meta-analysis) | 10% Povidone-iodine | Yes | Every 3 days or as needed |
| Biehl, 2016,  Germany3 | February 2012- September 2014 | RCT | 10 hematological departments | Hematologic patients undergoing chemotherapy and expected neutropenia ≥ 5 days  (adults) | CHG gel dressing (3M Tegaderm IV securement dressing)  vs  polyurethane dressing (3M Tegaderm IV advanced) | Short-term CVC  (jugular, subclavian) | Yes  (~70% of patients in both groups with silver/CHG coated CVC) | NR | NR | Every 3 (± 1) days |
| Chambers, 2005, New Zealand4 | August 1998- December 2001 | RCT | 1 | Hematologic patients undergoing chemotherapy or bone marrow transplant  (adults) | CHG sponge disc dressing (Biopatch®)  vs  No dressing | Long-term CVC (hickman, hemocath) | No | Alcoholic-povidone iodine 10% | NR | CHG group: every 7 days or as needed  Control group: N/A |
| Chan, 2017, Australia5 | March 2014-March 2015 | RCT | 1 | Non-ICU patients (medical, surgical, onco-hematological patients)  (adults) | CHG sponge disc dressing (Biopatch®)  plus 3 different securement methods: SPU+SSD, PAL+ tape, CSD)a  vs  Tissue adhesive + standard polyurethane dressing | PICC line | No | 2% CHG in 70% alcohol  (if allergy, 10% povidone-iodine was used) | NR | Every 7 days or as needed |
| Düzkaya, 2016, Turkey6 | December 2012– January 2014 | RCT | 1 | ICU  (pediatrics) | CHG dressing  vs  sterilized pad | Short-term CVC  (jugular, subclavian, femoral) | No | 10% povidone-iodine | Yes | CHG group: every 7 days or as needed  Control group: every 48 hours or as needed |
| Ergul, 2018, Turkey7 | October 2014-March 2017 | Quasi-experimental (before-after study) | 1 | ICU  (pediatrics) | CHG dressing (3M Tegaderm IV securement dressing)  vs  standard polyurethane dressing (3M Tegaderm transparent film dressing) | Short-term (jugular) | No | > 0.5% CHG-alcohol preparation | NR | CHG group: every 7 days or as needed  Control group: every 48h or as needed |
| Garland, 2001, US8 | June 1994–August 1997 | RCT | 6 hospitals | ICU (neonates) | CHG sponge disc dressing (Biopatch®)  vs  polyurethane dressing (biocclusive transparent dressing) | Short-term CVC (not specified)  Long-term CVC (broviac) | No | CHG group: 70% alcohol  Control group: 10% povidone-iodine | Yes | Every 7 days  (except  surgically placed Broviac catheters: twice weekly in control group) |
| Gerçeker, 2017, Turkey9 | October 2014- May 2015 | RCT | 1 | Hemato-oncological patients (pediatrics, older than 2 months) | CHG dressing (3M Tegaderm IV securement dressing)  vs  standard polyurethane dressing (3M Tegaderm IV advanced securement dressing) | Long-term CVC (hickman, port catheters) | No | NR | Yes | Every 7 days or as needed |
| Levy, 2005, Israel10 | Jan 2002-March 2003 | RCT | 1 | ICU  (neonates and pediatric population) | CHG sponge disc dressing (Biopatch®)  vs  standard polyurethane dressing | Short-term CVC  (jugular) | No | CHG solution | Yes | As needed |
| Maki, 2000, US11  [Conference abstract] | NR | RCT | Multicentric study  (number not specified) | NR  (probably adults) | CHG sponge disc dressing (Biopatch®)  vs  transparent film dressing | Short-term CVC (not specified), arterial, pulmonary artery catheters | No | NR | NR | CHG group: every 7 days  Control group: every 2 days |
| Margatho, 2018, Brazil12 | April-December 2014 | RCT | 1 | ICU and cardiothoracic ICU  (adults) | CHG dressing (3M Tegaderm CHG IV securement dressing)  vs  standard polyurethane dressing (3M Tegaderm transparent film dressing) | Short-term CVC  (jugular, subclavian, femoral) | No | 0.5% CHG-alcohol preparation | Yes + Daily CHG bathing performed in all patients | Every 7 days or as needed |
| O’Horo, 2013, US13  [Conference abstract] | December 2008– August 2012 | Quasi-experimental (before-after study) | 1 | NR  (probably adults) | CHG sponge disc dressing (Biopatch®)  vs  NR | Long-term CVC (tunneled, cuffed CVC) | No | NR | NR | NR |
| Pedrolo, 2014, Brazil14 | October 2011–May 2012 | RCT | 1 | ICU and semi-ICU (adults) | CHG dressing  vs  gauze and tape | Short-term CVC  (jugular, subclavian) | No | NR | Yes | CHG group: every 7 days or before if dressing edges detached  Control group: every 48h or before if dressings edges detached |
| Pivkina, 2018, Russia15 | August 2014–December 2014 | RCT | 1 | Medical ICU (patients with infectious/  septic complications  (adults) | CHG dressing (3M TegadermCHG dressing) and skin protective acrylic terpolymer barrier film  vs  standard polyurethane dressing | Short-term CVC  (jugular, subclavian) | No | 0.5% CHG-70% alcohol preparation | Yes | Every 7 days or as needed |
| Roberts, 1998, Australia16 | NR | RCT | 1 | ICU  (adults) | CHG sponge disc dressing (Biopatch®)  vs  occlusive dressing | CVC  (not specified) | No | 0.5% CHG-70% alcohol preparation | Yes | Every 5 days or as needed |
| Ruschulte, 2009, Germany17 | January 2004–January 2006 | RCT | 1 | Hemato-oncological patients (adults) | CHG sponge disc dressing (Biopatch®)  vs  standard sterile transparent dressing | Short-term CVC  (jugular, subclavian) | Yes  (CHG and silver sulfadiazine-impregnated CVC) | Alcohol | Yes | Every 7 days or after lifted up for inspection controls |
| Timsit, 2009, France18 | December 2006- May 2008 | RCT | 5 hospitals | ICU  (adults) | CHG sponge disc dressing (Biopatch®)  vs  standard polyurethane dressing (3M Tegaderm transparent film dressing) | Short-term CVC (jugular, subclavian, femoral)  +  Long-term CVC (tunneled CVC)  +  Arterial catheters | No | 5% povidone iodine-70% alcohol | Yes | Every 3 or 7 days. It could be changed before if needed. |
| Timsit, 2012, France19 | May 2010-July 2011 | RCT | 11 hospitals | ICU  (adults) | CHG dressing (Tegaderm CHG dressing)  vs  standard polyurethane dressing (3M Tegaderm transparent film dressing) OR highly adhesive dressing (3M Tegaderm HP transparent film dressing) | Short-term CVC (jugular, subclavian, femoral)  +  Long-term CVC (tunneled CVC)  +  Arterial catheters | No | 5% povidone iodine-70% alcohol  OR  67% ethanol-0.5% chlorhexidine solution  OR  0.25% CHG-0.025% benzalkonium chloride-4% benzyl alcohol  (if alcoholic solution not available: 2% CHG) | Yes | Every 3 or 7 days. It could be changed before if needed |
| Yu, 2019, China20 | January 2014–September 2015 | RCT | 1 | Medical ICU  (adults) | CHG transparent dressing (3M Tegaderm transparent dressing)  vs  standard transparent dressing | Short-term CVC  (jugular, subclavian, femoral) | No | 2% CHG alcohol | Yes | CHG groupb: every 7 days or if needed  Control groupb: every 3 or if needed |

Abbreviations: CHG, chlorhexidine; CVC, central venous catheter; ICU, intensive care unit; PICC: peripherally inserted central catheters; N/A, non-applicable; NR: not reported;

aSPU+SSD: standard polyurethane dressing plus sutureless securement device, PAL + tape: polyurethane with absorbent lattice pad plus non-woven tape, CSD: combination securement dressing

bInformation obtained from preliminary results of the same study published in a previous article21

**References**

1. Arpa Y, Aygün H, YalçInbaş Y, San D, Ulukol A. Comparison of catheter related infection rates in pediatric cardiovascular surgery

patients with use of transparent cover and transparent cover saturated with chlorhexidin gluconate in central catheter care. *Turkish J*

*Res Dev Nurs* 2013;15:57-67.

2. Arvaniti K, Lathyris D, Clouva-Molyvdas P, et al. Comparison of Oligon catheters and chlorhexidine-impregnated sponges with

standard multilumen central venous catheters for prevention of associated colonization and infections in intensive care unit patients: a

multicenter, randomized, controlled study. *Crit Care Med* 2012;40:420-429.

3. Biehl LM, Huth A, Panse J, et al. A randomized trial on chlorhexidine dressings for the prevention of catheter-related bloodstream

infections in neutropenic patients. Ann Oncol 2016;27:1916-1922.

4. Chambers ST, Sanders J, Patton WN, et al. Reduction of exit-site infections of tunnelled intravascular catheters among neutropenic patients by sustained-release chlorhexidine dressings: results from a prospective randomized controlled trial. *J Hosp Infect* 2005;61:53-61.

5. Chan RJ, Northfield S, Larsen E, et al. Central venous access device securement and dressing effectiveness for peripherally inserted central catheters in adult acute hospital patients (CASCADE): a pilot randomised controlled trial. *Trials* 2017;18:458.

6. Duzkaya DS, Sahiner NC, Uysal G, Yakut T, Citak A. Chlorhexidine-Impregnated Dressings and Prevention of Catheter-Associated Bloodstream Infections in a Pediatric Intensive Care Unit. *Crit Care Nurse* 2016;36:e1-e7.

7. Ergul AB, Gokcek I, Ozcan A, Cetin S, Gultekin N, Torun YA. Use of a chlorhexidine-impregnated dressing reduced catheter

Related bloodstream infections caused by Gram-positive microorganisms. *Pak J Med Sci* 2018;34:347-351.

8. Garland JS, Alex CP, Mueller CD, et al. A randomized trial comparing povidone-iodine to a chlorhexidine gluconate-impregnated dressing for prevention of central venous catheter infections in neonates. *Pediatrics* 2001;107:1431-1436.

9. Gerceker GO, Yardimci F, Aydinok Y. Randomized controlled trial of care bundles with chlorhexidine dressing and advanced

dressings to prevent catheter-related bloodstream infections in pediatric hematology-oncology patients*. Eur J Oncol Nurs* 2017;28:14-

20.

10. Levy I, Katz J, Solter E, et al. Chlorhexidine-impregnated dressing for prevention of colonization of central venous catheters in

infants and children: a randomized controlled study. *Pediatr Infect Dis* J 2005;24:676-679.

11. Maki DG, Mermel LA, Kluger D, Narans L, Knasinski V, Parenteau S, Covington P. The efficacy of a chlorhexidine-impregnated

Sponge (BiopatchTM) for the prevention of intravascular catheter-related infection: A prospective, randomized, controlled,

multicenter study. 40 th *Interscience Conference on Antimicrobial Agents and Chemotherapy*. Toronto; 2000:422.

12. Margatho AS, Ciol MA, Hoffman JM, et al. Chlorhexidine-impregnated gel dressing compared with transparent polyurethane

dressing in the prevention of catheter-related infections in critically ill adult patients: A pilot randomised controlled trial. *Aust Crit*

*Care* 2018; 32:471–478.

13. O'Horo SK, Corson D, Baum RA. Efficacy of biopatch™ in reducing catheter related infections in cuffed, tunneled central venous

catheters. *J Vasc Interv Radiol* 2013;24:S127.

14. Pedrolo E, Danski MT, Vayego SA. Chlorhexidine and gauze and tape dressings for central venous catheters: a randomized clinical trial. *Rev Lat Am Enfermagem* 2014;22:764-771.

15. Pivkina AI, Gusarov VG, Blot SI, Zhivotneva IV, Pasko NV, Zamyatin MN. Effect of an acrylic terpolymer barrier film beneath transparent catheter dressings on skin integrity, risk of dressing disruption, catheter colonisation and infection. Intensive *Crit Care Nurs* 2018;46:17-23.

16. Roberts B, Cheung D. Biopatch--a new concept in antimicrobial dressings for invasive devices. *Aust Crit Care* 1998;11:16-19.

17. Ruschulte H, Franke M, Gastmeier P, et al. Prevention of central venous catheter related infections with chlorhexidine gluconate impregnated wound dressings: a randomized controlled trial. *Ann Hematol* 2009;88:267-272.

18. Timsit JF, Schwebel C, Bouadma L, et al. Chlorhexidine-impregnated sponges and less frequent dressing changes for prevention

of catheter-related infections in critically ill adults: a randomized controlled trial. *JAMA* 2009;301:1231-1241.

19. Timsit JF, Mimoz O, Mourvillier B, et al. Randomized controlled trial of chlorhexidine dressing and highly adhesive dressing for

preventing catheter-related infections in critically ill adults. *Am J Respir Crit Care Med* 2012;186:1272-1278.

20. Yu K, Lu M, Meng Y, Zhao Y, Li Z. Chlorhexidine gluconate transparent dressing does not decrease central line-associated bloodstream infection in critically ill patients: A randomized controlled trial. *Int J Nurs Pract* 2019:e12776.

21. Yu K, Li Z, Wang J, Li H, Lu M. Effect and cost analysis of two kinds of transparent dressings on the bloodstream infection rate

of central venous catheter. *Chin J Pract Nurs* 2015;31:2777-80.
